# Supplementary material for: Anti-inflammatory cytokines IL-35 and IL-10 block atherogenic lysophosphatidylcholine-induced, mitochondrial ROS-mediated innate immune activation, but spare innate immune memory signature in endothelial cells
Source: PubMed Central journal article supplement — Redox Biol. 2019 Nov 6;28:101373. doi: 10.1016/j.redox.2019.101373 (PMC6920093; doi:10.1016/j.redox.2019.101373), 2019-11-06
Supplement: mmc1.pdf [file mmc1.pdf]

## Supplemental Figure 1

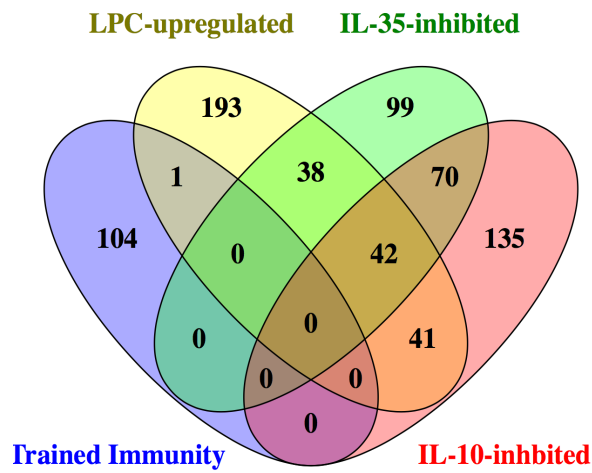

**Supplemental Figure 1. No overlap is found between  $\beta$ -glucan-induced trained immunity response (innate immune memory) in human monocytes and IL-35/IL-10-inhibited genes in human aortic endothelial cells (HAEC). RNA-Seq data GSE58310 (n=4 in each group) downloaded from NIH-NCBI-Gene Expression Omnibus (GEO) were analyzed to investigate the relationship between genes that are significantly upregulated by  $\beta$ -glucan (trained immunity genes) for more than 2 folds in human monocytes (PMID: 25258085), and LPC-upregulated genes, IL-35-inhibited genes, and IL-10-inhibited genes (by more than 1.4-fold in the three groups) in HAEC.**

## Supplemental Figure 2

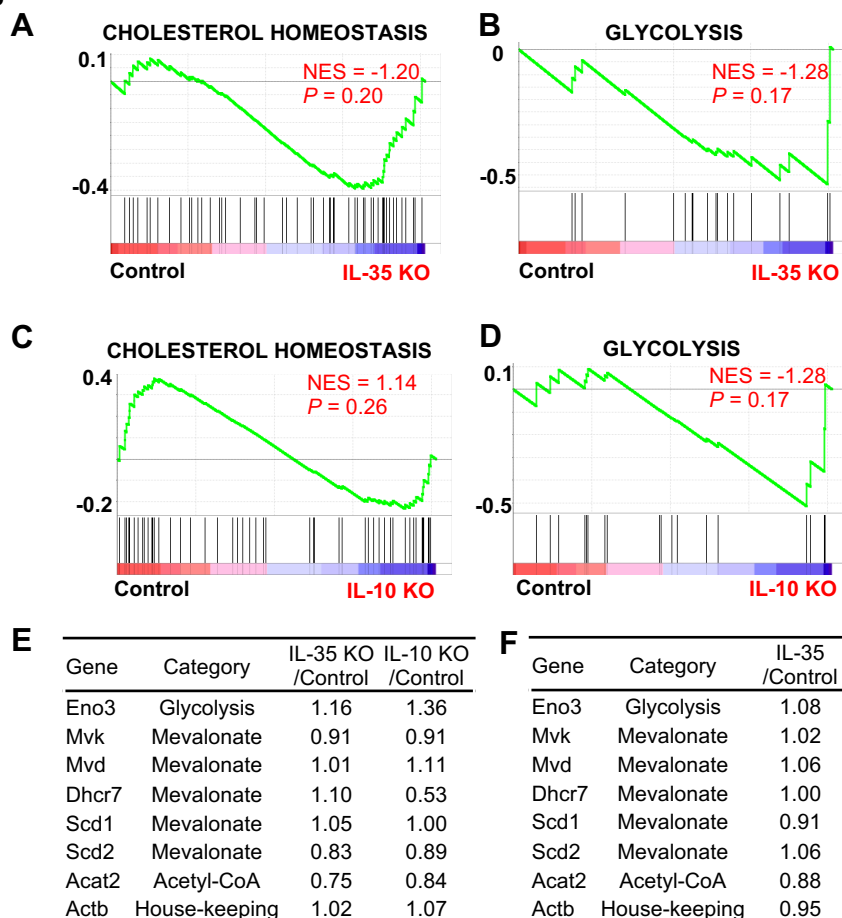

**Supplemental Figure 2. IL-35 and IL-10 do not affect trained immunity signatures in T cells.** RNA-Seq data GSE24210 (A to E, n =2~3 in each group) downloaded from Gene Expression Omnibus (GEO) were analyzed to investigate the effects of regulatory T cell (Treg)-specific deficiency of IL-35/IL-10 on murine T cells. RNA-Seq data GSE127735 (F, n=3 in each group) downloaded from GEO were analyzed to investigate the effects of IL-35 treatment on murine T cells (F). A&B. GSEA plots showing that glycolysis and cholesterol homeostasis pathways are not affected in T cells upon Treg-specific deficiency of IL-35. C&D. GSEA plots showing that glycolysis and cholesterol homeostasis pathways are not changed in T cells upon Treg-specific deficiency of IL-10. E. Representative gene expression changes in T cells upon Treg-specific deficiency of IL-35/IL-10. F. Representative gene expression changes in T cells upon IL-35 treatment. NES, normalized enrichment score. FDR, false discovery rate.

**Supplemental Figure 3**

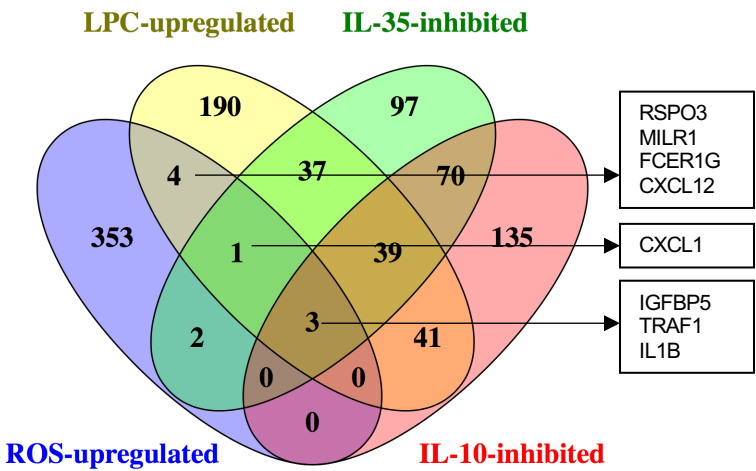

**Supplemental Figure 3. Reactive oxygen species (ROS) partially mediate the inhibitory effects of IL-35 and IL-10 in LPC-treated human aortic endothelial cells (HAEC).** RNA-Seq data GSE7810 (n=3 in each group) downloaded from Gene Expression Omnibus (GEO) were analyzed to examine the relationship between genes that are significantly upregulated in Nrf2 knockout cells (ROS-upregulated genes) and LPC-upregulated genes, IL-35-inhibited genes, and IL-10-inhibited genes (by more than 1.4-fold in the three groups) in HAEC.

## Supplemental Figure 4

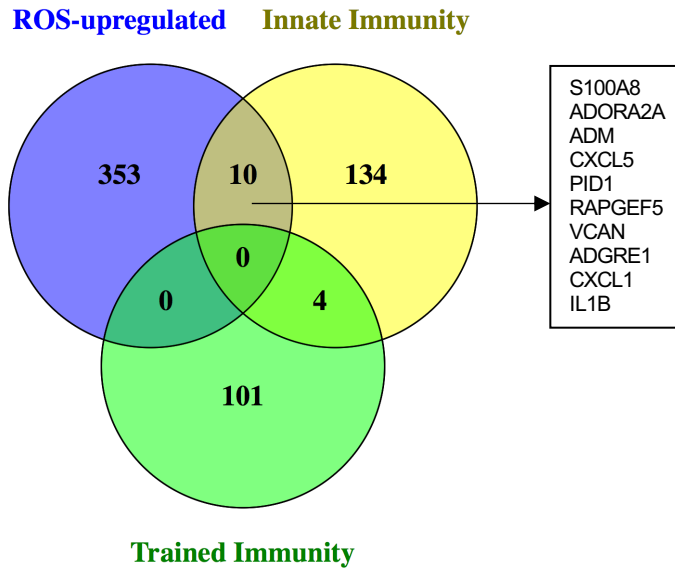

**Supplemental Figure 4. Reactive oxygen species (ROS) partially mediate LPS-induced innate immunity response, while ROS do not have any effect on  $\beta$ -glucan-induced trained immunity response in human monocytes.** RNA-Seq data GSE7810 (n=3 in each group) and GSE58310 (n=4 in each group) downloaded from Gene Expression Omnibus (GEO) were analyzed to investigate the relationship between genes that are significantly upregulated in Nrf2 knockout cells (ROS-upregulated genes) and genes that are significantly upregulated by lipopolysaccharide (LPS, innate immunity genes) or  $\beta$ -glucan (trained immunity genes) for more than 2 folds in human monocytes.

## Supplemental Figure 5

ROS Regulators    Innate Immunity

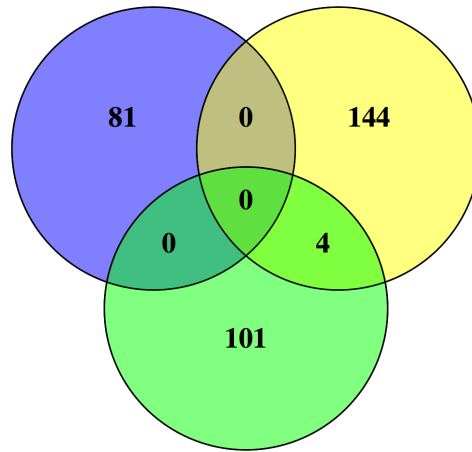

Trained Immunity

**Supplemental Figure 5. LPS-induced innate immunity response/  $\beta$ -glucan-induced trained immunity response does not alter reactive oxygen species (ROS) regulator gene expressions.** RNA-Seq data GSE58310 (n=4 in each group) downloaded from Gene Expression Omnibus (GEO) were analyzed to investigate the relationship between ROS regulators and genes that are significantly upregulated by lipopolysaccharide (LPS, innate immunity genes) or  $\beta$ -glucan (trained immunity genes) for more than 2 folds in human monocytes.

**Supplemental Table 1. IL-35 and IL-10 block LPC-induced endothelial activation.** HAEC were preincubated with 10 ng/ml of IL-35 and IL-10 for 1 hour. After stimulation of LPC (10 $\mu$ M) for 18 hours, RNAs were collected for Human EC Biology PCR array (QIAGEN) analysis. Pooled samples (n=3) in each group.

| Gene     | LPC<br>/Control | LPC+IL-35<br>/Control | LPC+IL-10<br>/Control |
|----------|-----------------|-----------------------|-----------------------|
| SELE     | 2.22            | 3.10                  | 2.39                  |
| CCL2     | 2.11            | 1.88                  | 2.15                  |
| PLAT     | 1.81            | 1.34                  | 1.49                  |
| VCAM1    | 1.80            | 0.94                  | 1.14                  |
| IL1B     | 1.74            | 0.93                  | 1.23                  |
| ICAM1    | 1.61            | 1.29                  | 1.62                  |
| TIMP1    | 1.45            | 1.50                  | 1.37                  |
| TNFSF10  | 1.37            | 1.35                  | 1.49                  |
| TYMP     | 1.33            | 1.36                  | 0.99                  |
| ITGAV    | 1.29            | 1.52                  | 1.53                  |
| SERPINE1 | 1.29            | 1.52                  | 1.52                  |
| VEGFA    | 1.29            | 1.07                  | 1.05                  |
| IL7      | 1.28            | 1.00                  | 1.37                  |
| EDN1     | 1.22            | 1.21                  | 1.33                  |
| TEK      | 1.22            | 1.39                  | 1.40                  |
| THBD     | 1.22            | 1.40                  | 1.28                  |
| CDH5     | 1.21            | 1.41                  | 1.41                  |
| OCLN     | 1.20            | 1.40                  | 1.49                  |
| ITGB1    | 1.20            | 1.22                  | 1.31                  |
| CFLAR    | 1.19            | 1.26                  | 1.25                  |
| ENG      | 1.19            | 0.90                  | 0.67                  |
| PTGIS    | 1.17            | 0.73                  | 0.85                  |
| ADAM17   | 1.17            | 1.17                  | 1.17                  |
| ANXA5    | 1.16            | 1.19                  | 1.20                  |
| HIF1A    | 1.16            | 1.19                  | 1.28                  |
| CAV1     | 1.15            | 1.19                  | 1.25                  |
| TFPI     | 1.12            | 1.15                  | 1.20                  |
| BAX      | 1.11            | 1.23                  | 1.21                  |
| ITGA5    | 1.10            | 1.29                  | 1.25                  |
| CASP3    | 1.09            | 1.15                  | 1.10                  |
| PTGS2    | 1.08            | 1.26                  | 1.23                  |
| BCL2L1   | 1.08            | 1.40                  | 1.29                  |
| SPHK1    | 1.07            | 1.15                  | 1.19                  |
| KIT      | 1.07            | 1.17                  | 1.09                  |
| FGF2     | 1.06            | 1.25                  | 1.24                  |
| KDR      | 1.06            | 1.26                  | 1.41                  |
| PGF      | 1.06            | 1.09                  | 1.15                  |
| PTK2     | 1.04            | 1.29                  | 1.28                  |
| IL6      | 1.02            | 1.02                  | 1.01                  |
| VWF      | 1.01            | 1.12                  | 1.13                  |
| ITGB3    | 1.01            | 1.04                  | 0.91                  |
| F2R      | 1.01            | 0.97                  | 0.95                  |
| PLAU     | 1.00            | 1.08                  | 1.07                  |
| FLT1     | 1.00            | 1.22                  | 1.28                  |
| F3       | 1.00            | 0.87                  | 0.93                  |
| ACE      | 0.99            | 1.12                  | 1.18                  |
| PROCR    | 0.99            | 1.13                  | 0.98                  |
| THBS1    | 0.97            | 1.17                  | 1.16                  |
| COL18A1  | 0.97            | 1.01                  | 0.96                  |
| SOD1     | 0.96            | 0.90                  | 0.93                  |
| FAS      | 0.96            | 0.98                  | 1.08                  |
| BCL2     | 0.94            | 1.14                  | 1.22                  |
| MMP2     | 0.92            | 0.96                  | 0.77                  |
| TGFB1    | 0.92            | 1.14                  | 0.92                  |
| PECAM1   | 0.91            | 0.89                  | 0.93                  |
| CASP1    | 0.91            | 0.84                  | 0.46                  |
| NOS3     | 0.89            | 1.30                  | 1.22                  |
| HMOX1    | 0.89            | 0.89                  | 1.08                  |
| FN1      | 0.86            | 1.18                  | 1.21                  |
| SELL     | 0.85            | 1.23                  | 0.99                  |
| MMP1     | 0.73            | 0.70                  | 0.88                  |

**Supplemental Table 2. IL-35 specifically induces IL-35 receptor subunit IL35RB1 in HAEC.** HAEC were preincubated with 10 ng/ml of IL-35 and IL-10 for 1 hour. After stimulation of LPC (10 $\mu$ M) for 18 hours, RNAs were collected for RNA-Seq analysis. Pooled samples (n=3) in each group.

| Gene    | Receptor for | LPC/ Control | LPC+IL-35/ LPC | LPC+IL-10/ LPC |
|---------|--------------|--------------|----------------|----------------|
| IL35RB1 | IL-35        | $-\infty$    | $\infty$       | 1.00           |
| IL27RA  | IL-35        | 0.93         | 1.00           | 0.99           |
| IL6ST   | IL-35        | 0.95         | 0.97           | 0.95           |
| IL10RA  | IL-10        | 0.97         | $-\infty$      | 0.99           |
| IL10RB  | IL-10        | 1.04         | 1.04           | 0.95           |

**Supplemental Table 3. IL-35 and IL-10 do not change acetyl-CoA generating enzymes in HAEC.** HAEC were preincubated with 10 ng/ml of IL-35 and IL-10 for 1 hour. After stimulation of LPC (10 $\mu$ M) for 18 hours, RNAs were collected for RNA-Seq analysis. Genes that are changed by more than 1.5 folds are highlighted in red. Pooled samples (n=3) in each group.

| Gene    | LPC /Control | LPC+IL-35 /LPC | LPC+IL-10 /LPC |
|---------|--------------|----------------|----------------|
| ACAA2   | 1.05         | 1.01           | 1.06           |
| ACAD10  | 0.93         | 0.88           | 1.02           |
| ACAD11  | 1.14         | 1.12           | 0.98           |
| ACAD8   | 0.95         | 1.06           | 0.99           |
| ACAD9   | 1.07         | 1.10           | 1.11           |
| ACADM   | 1.01         | 1.01           | 1.04           |
| ACADS   | 0.88         | 1.18           | 1.15           |
| ACADSB  | 1.01         | 0.79           | 0.80           |
| ACADVL  | 1.23         | 1.01           | 1.02           |
| ACAT1   | 1.26         | 0.73           | 0.73           |
| ACAT2   | 1.56         | 0.84           | 1.27           |
| ACLY    | 1.21         | 1.03           | 1.03           |
| ACO1    | 1.09         | 0.99           | 1.02           |
| ACSS1   | 1.07         | 1.08           | 0.89           |
| ACSS2   | 1.10         | 1.09           | 1.18           |
| ADH1B   | 1.00         | 1.00           | 1.00           |
| ALDH1A1 | 1.00         | 0.97           | 0.97           |
| ALDH1A2 | 1.04         | 1.16           | 0.98           |
| ALDH1A3 | 0.94         | 1.01           | 1.07           |
| ALDH1B1 | 1.06         | 1.12           | 1.15           |
| ALDH1L2 | 440.00       | 0.95           | 0.92           |
| ALDH2   | 1.03         | 1.09           | 1.16           |
| BCAT2   | 1.16         | 1.02           | 0.98           |
| BCKDHA  | 1.01         | 1.04           | 1.00           |
| BCKDHB  | 0.97         | 0.99           | 1.18           |
| BCKDK   | 1.04         | 1.04           | 0.94           |
| BDH1    | 0.93         | 1.04           | 0.84           |
| ECH1    | 1.32         | 0.89           | 0.98           |
| GLS     | 1.05         | 0.96           | 0.94           |
| GLUD1   | 1.06         | 0.98           | 1.04           |
| GOT1    | 1.00         | 1.09           | 1.10           |
| HADH    | 0.87         | 1.09           | 1.00           |
| IDH1    | 1.23         | 1.03           | 0.98           |
| OXCT1   | 0.95         | 1.03           | 1.04           |
| PDHA1   | 1.14         | 1.00           | 1.03           |
| PDHB    | 1.06         | 1.04           | 1.08           |



## Supplemental Table 4. List of 84 ROS regulators.

| Gene Symbol | Gene name                                                                             |
|-------------|---------------------------------------------------------------------------------------|
| GPX1        | Glutathione peroxidase 1                                                              |
| GPX2        | Glutathione peroxidase 2                                                              |
| GPX3        | Glutathione peroxidase 3                                                              |
| GPX4        | Glutathione peroxidase 4                                                              |
| GPX5        | Glutathione peroxidase 5                                                              |
| GPX6        | Glutathione peroxidase 6                                                              |
| GPX7        | Glutathione peroxidase 7                                                              |
| GSTK1       | glutathione S-transferase kappa 1                                                     |
| EHD2        | EH-domain containing 2                                                                |
| PRDX1       | Peroxiredoxin 1                                                                       |
| PRDX2       | Peroxiredoxin 2                                                                       |
| PRDX3       | Peroxiredoxin 3                                                                       |
| PRDX4       | Peroxiredoxin 4                                                                       |
| PRDX5       | Peroxiredoxin 5                                                                       |
| PRDX6       | Peroxiredoxin 6                                                                       |
| AASS        | Aminoacidate-semialdehyde synthase                                                    |
| APC         | Adenomatous polyposis coli                                                            |
| CAT         | Catalase                                                                              |
| CTSB        | Cathepsin B                                                                           |
| DUOX1       | Dual oxidase 1                                                                        |
| EPX         | Eosinophil peroxidase                                                                 |
| KIF9        | Kinesin family member 9                                                               |
| LPO         | Lactoperoxidase                                                                       |
| MPO         | Myeloperoxidase                                                                       |
| PRDX6-RS1   | Peroxiredoxin 6 related sequence 1                                                    |
| PTGS1       | Prostaglandin-endoperoxide synthase 1                                                 |
| PTGS2       | Prostaglandin-endoperoxide synthase 2                                                 |
| RAG2        | Recombination activating gene 2                                                       |
| SERPINB1B   | Serine (or cysteine) peptidase inhibitor,clade B, member 1b                           |
| SLC41A3     | Solute carrier family 41, member 3                                                    |
| TMOD1       | Tropomodulin 1                                                                        |
| TPO         | Thyroid peroxidase                                                                    |
| GSR         | Glutathione reductase                                                                 |
| NXN         | Nucleoredoxin                                                                         |
| SRXN1       | Sulfiredoxin 1 homolog                                                                |
| TXNRD1      | Thioredoxin reductase 1                                                               |
| TXNRD2      | Thioredoxin reductase 2                                                               |
| TXNRD3      | Thioredoxin reductase 3                                                               |
| SOD1        | Superoxide dismutase 1                                                                |
| SOD2        | Superoxide dismutase 2                                                                |
| SOD3        | Superoxide dismutase 3                                                                |
| CCS         | Copper chaperone for superoxide dismutase                                             |
| CYBA        | Cytochrome b-245, alpha polypeptide                                                   |
| NCF2        | Neutrophil cytosolic factor 2                                                         |
| NOS2        | Nitric oxide synthase 2                                                               |
| NOX1        | NADPH oxidase 1                                                                       |
| NOX4        | NADPH oxidase 4                                                                       |
| NOXA1       | NADPH oxidase activator 1                                                             |
| NOXO1       | NADPH oxidase organizer 1                                                             |
| RECQL4      | RecQ protein-like 4                                                                   |
| SCD1        | Stearoyl-coenzyme A desaturase 1                                                      |
| FMO2        | Flavin containing monooxygenase 2                                                     |
| IL19        | Interleukin 19                                                                        |
| IL22        | Interleukin 22                                                                        |
| ALS2        | Amyotrophic lateral sclerosis 2                                                       |
| APOE        | Apolipoprotein E                                                                      |
| ERCC2       | Excision repair cross-complementing rodent repair deficiency, complementation group 2 |
| ERCC6       | Excision repair cross-complementing rodent repair deficiency, complementation group 6 |
| GAB1        | GRB2-associated binding protein 1                                                     |
| IDH1        | Isocitrate dehydrogenase 1                                                            |
| MPP4        | Membrane protein, palmitoylated 4                                                     |
| NQO1        | NAD(P)H dehydrogenase, quinone 1                                                      |
| NUDT15      | Nudix (nucleoside diphosphate linked moiety X)-type motif 15                          |
| PARK7       | Parkinson disease 7                                                                   |
| PPP1R15B    | Protein phosphatase 1, regulatory subunit 15B                                         |
| PRNP        | Prion protein                                                                         |
| PSMB5       | Proteasome subunit, beta type, 5                                                      |
| TXNIP       | Thioredoxin interacting protein                                                       |
| UCP3        | Uncoupling protein 3                                                                  |
| XPA         | Xeroderma pigmentosum, complementation group A                                        |
| AQR         | Aquarius homolog                                                                      |
| ATR         | Ataxia telangiectasia and Rad3 related                                                |
| CYGB        | Cytoglobin                                                                            |
| DNM2        | Dynamin 2                                                                             |
| FANCC       | Fanconi anemia, complementation group C                                               |
| HBQ1        | Hemoglobin, theta 1                                                                   |
| IFT172      | Intraflagellar transport 172 homolog                                                  |
| MB          | Myoglobin                                                                             |
| NGB         | Neuroglobin                                                                           |
| SLC38A1     | Solute carrier family 38, member 1                                                    |
| VIM         | Vimentin                                                                              |
